# Supplementary material for: GNB3 c.825c>T polymorphism influences T-cell but not antibody response following vaccination with the mRNA-1273 vaccine
Source: PubMed Central journal article supplement (PMC9465595; doi:10.3389/fgene.2022.932043), 2022-08-29

**Supplementary Figure 1.** Enrollment of participants for SARS-CoV-2-specific cellular immunity assessment with ELISpot assay one and six months after the second vaccination with mRNA-1273.

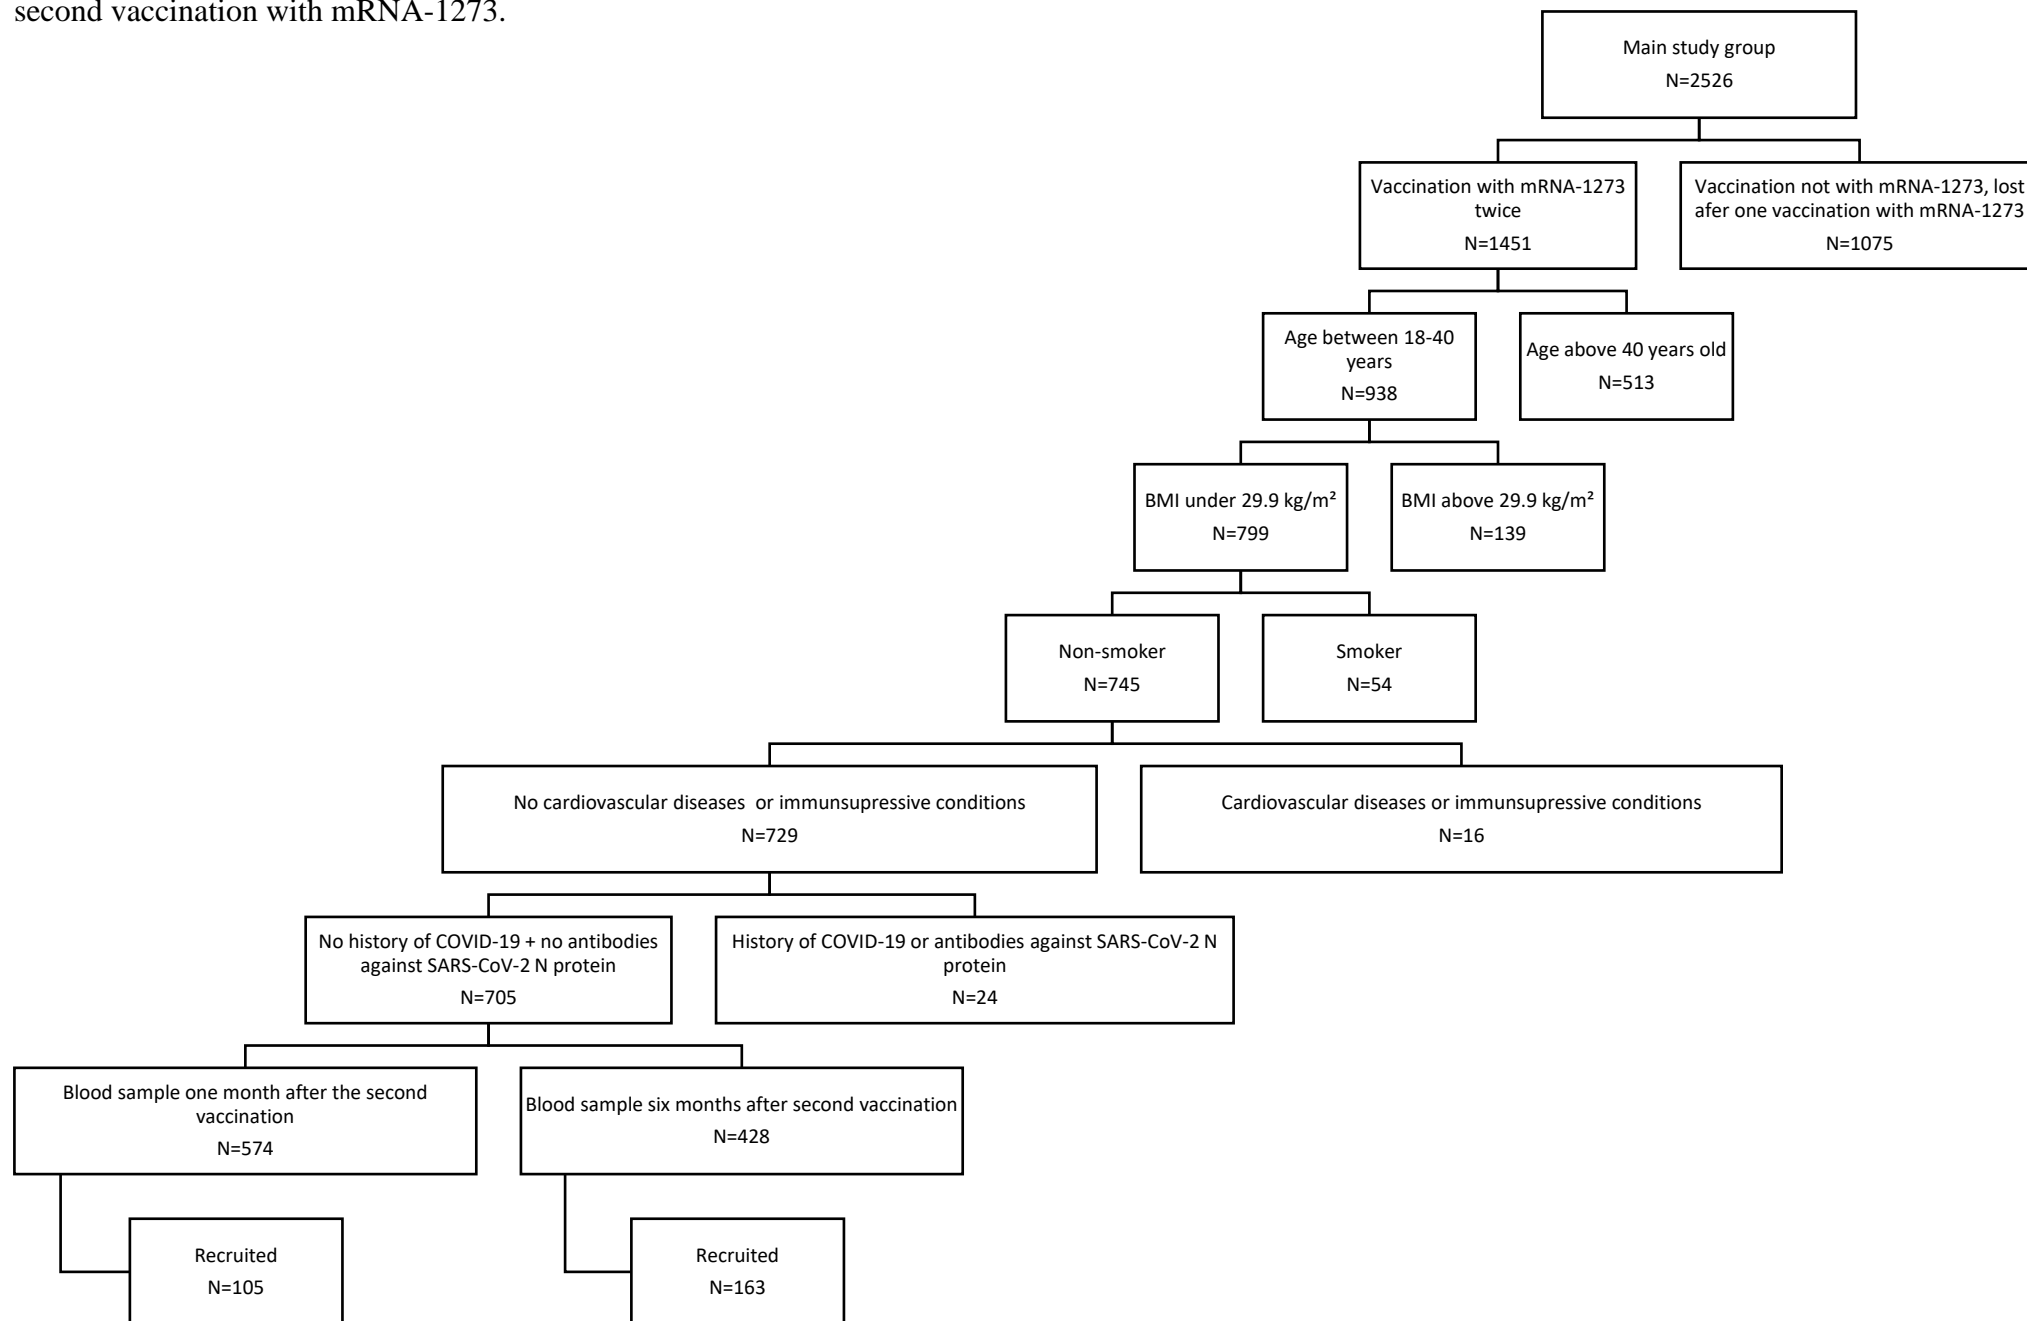

Supplement: Image1.pdf [file Image1.pdf]
